# Supplementary material for: Cerebrolysin ameliorates ketamine-mediated anxiety and cognitive impairments via modulation of mitochondrial function and CREB/PGC-1α pathway
Source: Mol Brain. 2025 Nov 7;18:84. doi: 10.1186/s13041-025-01255-1 (PMC12595893; doi:10.1186/s13041-025-01255-1)
Supplement: Supplementary file 2 — Supplementary Material 2 [file 13041_2025_1255_MOESM2_ESM.xlsx]

## Sheet: Western
				PGC-1a					CREB						P-CREB
			relative density (FOLD OF CONTROL)					relative density (FOLD OF CONTROL)						relative density (FOLD OF CONTROL)
		Group	Control	Ketamine	Ketamie +CBL			Control	Ketamine	Ketamine+CBL				Control	Ketamine	Ketamine+CBL
			1	0.5	0.95			1	0.48	0.9				1	0.215	0.864
			0.9	0.42	0.93			1	0.8	1.08				1	0.226	0.745
			1.01	0.74	0.84			1.12	0.6	0.9				1	0.642	0.676

## Sheet: ROS
	Control	Ketamine	Ketamine+CBL
	62	105	87
	70	115	94
	59	121	72
	63	118	84
	66	127	78

## Sheet: ATP
	Control	Ketamine	Ketamine+CBL
	5.3	2.7	4
	4.7	2.9	3.4
	5.9	3.2	4.1
	6	3.1	4.5
	5.5	2.4	5

## Sheet: OAT
		Control	Ketamine	Ketamine+CBL
		210	80	75
		117	51	95
		219	35	130
		165	46	106
		126	74	113
		154	62	66
		98	87	117
		109	68	125

## Sheet: OAE
		Control	Ketamine	Ketamine+CBL
		13	7	10
		16	5	12
		14	4	15
		11	9	9
		9	3	6
		16	6	11
		8	3	11
		9	6	8

## Sheet: NOR
			Familiar
		Control	95	120	94	105	132	90	86	127
		Ketamine	56	67	74	98	100	78	47	70
		Ketamine+CBL	68	59	80	100	102	69	53	89
			Novel
		Control	95	120	94	105	132	90	86	127
		Ketamine	56	67	74	98	100	78	47	70
		Ketamine+CBL	68	59	80	100	102	69	53	89
